# Supplementary material for: Patient-Reported Disease-Modifying Therapy Adherence in the Clinic: A Reliable Metric?
Source: PubMed Central journal article supplement — Mult Scler J Exp Transl Clin. 2018 May 23;4(2):2055217318777894. doi: 10.1177/2055217318777894 (PMC5971395; doi:10.1177/2055217318777894), 2018-05-23
Supplement: Supplementary_Table_2.pdf [file Supplementary_Table_2.pdf]

**Supplementary Table 2.**

|              |                 | Not Adjusted for Covariates |                     |         | Adjusted for Covariates |         |
|--------------|-----------------|-----------------------------|---------------------|---------|-------------------------|---------|
|              |                 | N                           | Estimate (95% CI)   | P-value | Estimate (95% CI)       | P-value |
| <b>PS</b>    | <b>6 months</b> | 501                         | 0.21 (-0.43, 0.84)  | 0.522   | 0.16 (-0.52, 0.84)      | 0.639   |
|              | <b>1 year</b>   | 544                         | -0.45 (-1.06, 0.16) | 0.150   | -0.62 (-1.28, 0.04)     | 0.065   |
|              | <b>2 years</b>  | 331                         | -0.32 (-1.12, 0.49) | 0.440   | -0.21 (-1.10, 0.68)     | 0.640   |
|              | <b>3 years</b>  | 247                         | -0.39 (-1.53, 0.75) | 0.504   | -0.22 (-1.41, 0.98)     | 0.723   |
| <b>PHQ-9</b> | <b>6 months</b> | 538                         | -0.08 (-0.69, 0.52) | 0.783   | -0.11 (-0.76, 0.54)     | 0.741   |
|              | <b>1 year</b>   | 590                         | -0.60 (-1.20, 0.00) | 0.051   | -0.74 (-1.39, -0.10)    | 0.024*  |
|              | <b>2 years</b>  | 363                         | -0.77 (-1.55, 0.01) | 0.054   | -0.41 (-1.24, 0.43)     | 0.342   |
|              | <b>3 years</b>  | 256                         | -0.68 (-1.59, 0.23) | 0.140   | -0.48 (-1.42, 0.46)     | 0.317   |
| <b>EQ-5D</b> | <b>6 months</b> | 567                         | 0.01 (-0.02, 0.03)  | 0.577   | 0.00 (-0.02, 0.03)      | 0.755   |
|              | <b>1 year</b>   | 623                         | 0.02 (-0.01, 0.04)  | 0.160   | 0.02 (-0.01, 0.04)      | 0.181   |
|              | <b>2 years</b>  | 371                         | 0.02 (-0.01, 0.04)  | 0.224   | 0.01 (-0.02, 0.04)      | 0.558   |
|              | <b>3 years</b>  | 259                         | 0.00 (-0.04, 0.03)  | 0.943   | 0.00 (-0.04, 0.04)      | 0.961   |
| <b>T25FW</b> | <b>6 months</b> | 593                         | -0.08 (-0.26, 0.11) | 0.421   | 0.03 (-0.16, 0.21)      | 0.787   |
|              | <b>1 year</b>   | 662                         | -0.08 (-0.25, 0.09) | 0.362   | -0.03 (-0.20, 0.13)     | 0.680   |
|              | <b>2 years</b>  | 412                         | -0.08 (-0.28, 0.12) | 0.412   | -0.04 (-0.24, 0.16)     | 0.672   |
|              | <b>3 years</b>  | 297                         | -0.05 (-0.30, 0.21) | 0.721   | -0.04 (-0.29, 0.22)     | 0.782   |

Effect of time-specific adherence on study outcomes with adherence defined as no missed doses over the prior six months. For outcomes at six months, one year, two years, and three years, the beta estimates are for adherence at six months, one year, two years, and three years respectively. PS = Performance Scales, PHQ-9 = Patient Health Questionnaire 9, EQ5D = European Quality of Life 5 Dimensions, T25FW = Timed 25 Foot Walk, CI = Confidence Interval
